# Supplementary material for: Malaria surveys using rapid diagnostic tests and validation of results using post hoc quantification of Plasmodium falciparum histidine-rich protein 2
Source: Springer Nature journal article supplement (doi:10.1186/s12936-017-2101-8), 2017-11-07
Supplement: MOESM1 [file 15205332]

**Table S1.** Point estimates and 95% confidence intervals for logistic dose-response model fit to data on rapid diagnostic test positivity as a function of HRP2 concentration in six field surveys

| Coefficient | Angola            |                   | Mozambique       | Mozambique       | Haiti            | Senegal         |
|-------------|-------------------|-------------------|------------------|------------------|------------------|-----------------|
|             | Huambo            | Angola Uíge       | 2013             | 2014             |                  |                 |
| $\beta_0$   | -8.9 (-11.2--7.2) | -9.1 (-10.8--7.8) | -4.4 (-5.0--3.9) | -3.4 (-3.9--2.9) | -6.8 (-7.9--6.0) | -8.7 (-11--7.1) |
| $\beta_1$   | 2.4 (1.9-2.9)     | 2.7 (2.3-3.2)     | 2.2 (1.9-2.4)    | 1.8 (1.6-2.0)    | 2.1 (1.6-2.7)    | 2.4 (2-2.9)     |

$$\frac{P(RDT +)}{1 - P(RDT +)} = \exp(\beta_0 + \beta_1 \log[HRP2])$$
